# Supplementary material for: Trimethylation of H3K27 during human cerebellar development in relation to medulloblastoma
Source: PubMed Central journal article supplement (PMC5668013; doi:10.18632/oncotarget.20741), 2017-09-08
Supplement: oncotarget-08-78978-s001.pdf [file oncotarget-08-78978-s001.pdf]

## Trimethylation of H3K27 during human cerebellar development in relation to medulloblastoma

### SUPPLEMENTARY MATERIAL

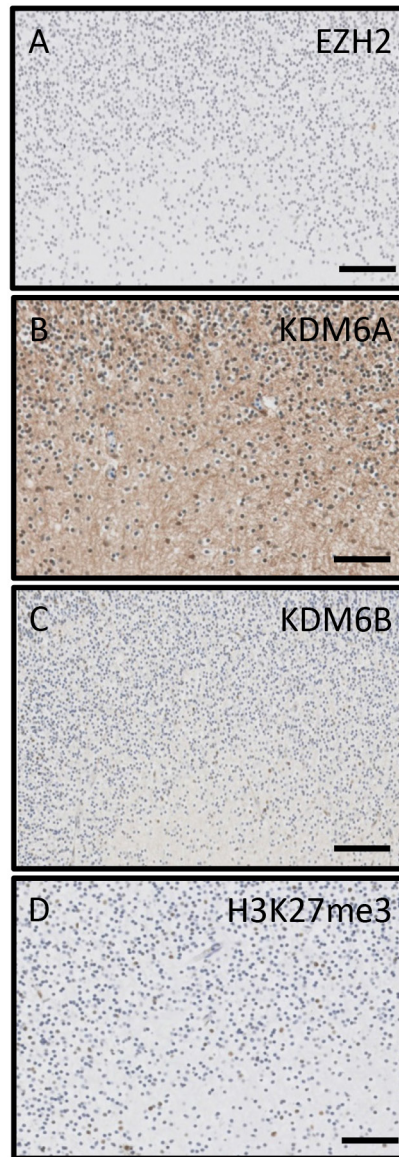

**Supplementary Figure 1: Expression of H3K27me3 and its modifiers at 9 weeks GSA in the ventricular zone.** Shown are expression of EZH2 (A), KDM6A (B), KDM6B (C), and H3K27me3 (D) in the ventricular zone, comprising mostly negatively stained granular cells. Scale bar size=25 $\mu$ m.
